# Supplementary material for: Conversion of methane to acetonitrile over GaN catalysts derived from gallium nitrate hydrate co-pyrolyzed with melamine, melem, or g-C3N4: the influence of nitrogen precursors
Source: Royal Society of Chemistry journal article supplement (doi:10.1039/d1cy01362a), 2021-11-11
Supplement: d1cy01362a1.pdf [file d1cy01362a1.pdf]

SUPPORTING INFORMATION

for

**Conversion of methane to acetonitrile over GaN catalysts derived  
from gallium nitrate hydrate co-pyrolyzing with melamine, melem, or  
g-C<sub>3</sub>N<sub>4</sub>: the influence of nitrogen precursors**

Korawich Trangwachirachai,<sup>a</sup> Chin-Han Chen,<sup>a</sup> Ai-Lin Huang,<sup>a</sup> Jyh-Fu Lee,<sup>b</sup>

Chi-Liang Chen,<sup>b</sup> and Yu-Chuan Lin<sup>a,\*</sup>

<sup>a</sup>Department of Chemical Engineering, National Cheng Kung University

No. 1 University Rd., Tainan 70101, Taiwan

<sup>b</sup>National Synchrotron Radiation Research Center

101 Hsin-Ann Rd., Hsinchu 30076, Taiwan

---

\* Corresponding author's Tel.: (886) 6 275 7575 ext. 62668; Fax: (886) 6 234 4496; E-mail:  
[yclin768@mail.ncku.edu.tw](mailto:yclin768@mail.ncku.edu.tw)

**Table S1.** The concentrations of Ga and N of used samples

| Catalyst                                   | Ga<br>(wt%) <sup>a</sup> | N<br>(wt%) <sup>b</sup> | N/Ga molar<br>ratio |
|--------------------------------------------|--------------------------|-------------------------|---------------------|
| c-GaN                                      | 80.3                     | 8.6                     | 0.53                |
| GaN-(melamine)-(1)                         | 75.6                     | 15.5                    | 1.02                |
| GaN-(melem)-(1)                            | 72.5                     | 15.4                    | 1.06                |
| GaN-(C <sub>3</sub> N <sub>4</sub> )-(0.5) | 73.9                     | 15.1                    | 1.02                |
| GaN-(C <sub>3</sub> N <sub>4</sub> )-(1)   | 73.7                     | 15.4                    | 1.04                |
| GaN-(C <sub>3</sub> N <sub>4</sub> )-(2)   | 75.9                     | 15.2                    | 1.00                |

<sup>a</sup>Estimated by ICP-MS ; <sup>b</sup>Estimated by EA

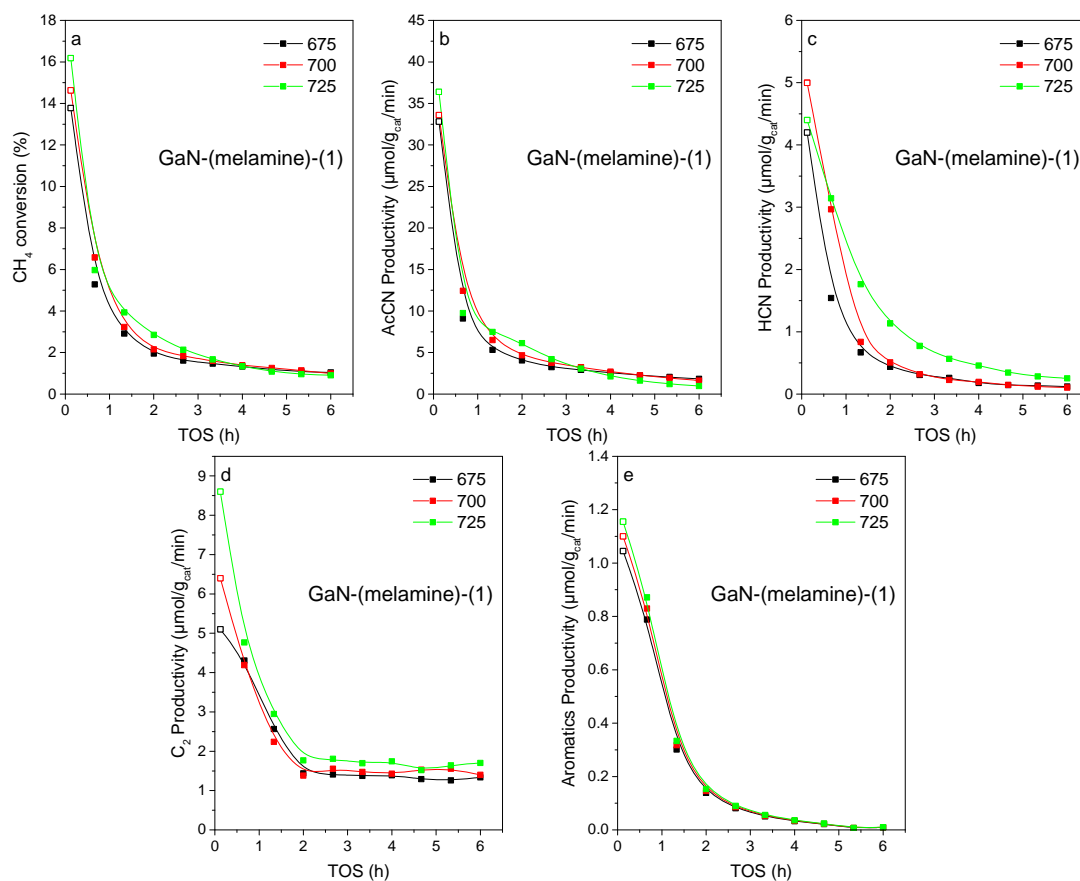

**Figure S1.** The TOS profiles of (a) CH<sub>4</sub> conversion and productivities of (b) AcCN, (c) HCN, (d) C<sub>2</sub>, and (e) aromatics at 675, 700, and 725 °C with GHSV = 3000 mL<sub>CH<sub>4</sub></sub>/g/h by testing GaN-(melamine)-(1). The open symbol means the initial activity calculated by using the MS signals; the closed symbol, calculated by the GC responses.

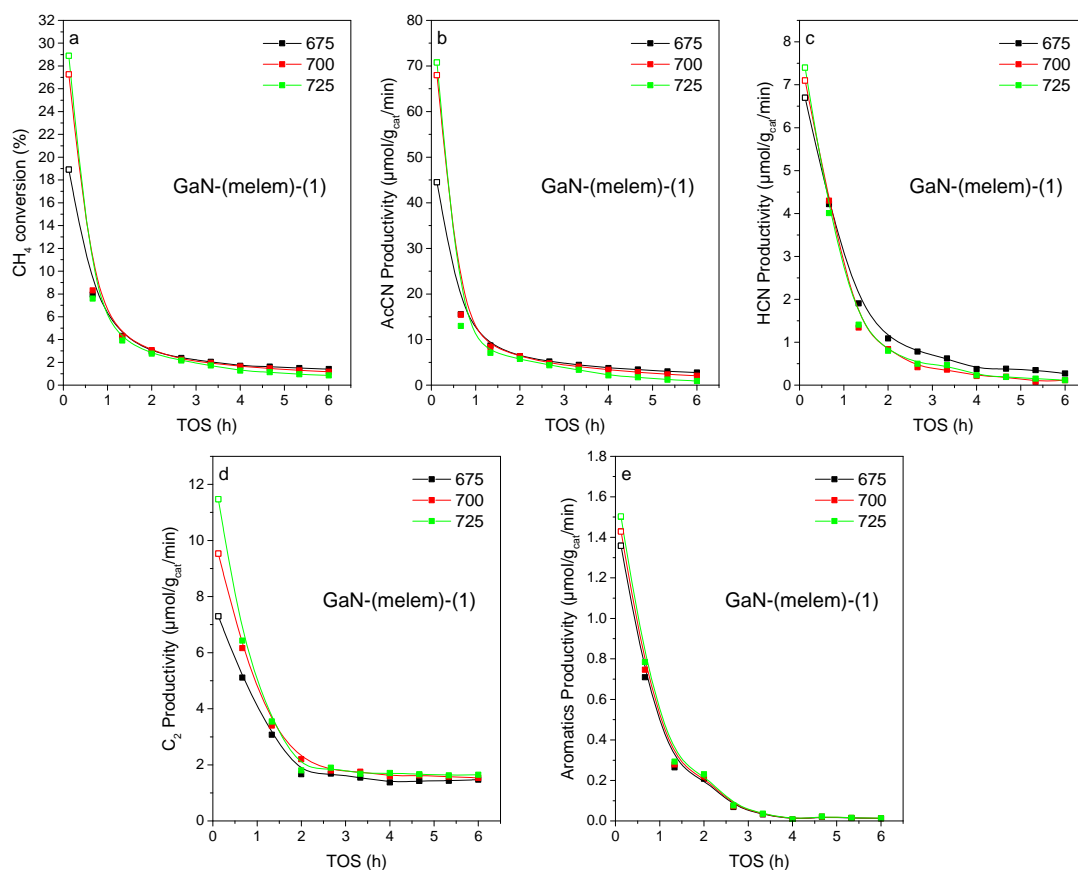

**Figure S2.** The TOS profiles of (a) CH<sub>4</sub> conversion and productivities of (b) AcCN, (c) HCN, (d) C<sub>2</sub>, and (e) aromatics at 675, 700, and 725 °C with GHSV = 3000 mL<sub>CH<sub>4</sub></sub>/g/h by testing GaN-(melem)-(1). The open symbol means the initial activity calculated by using the MS signals; the closed symbol, calculated by the GC responses.

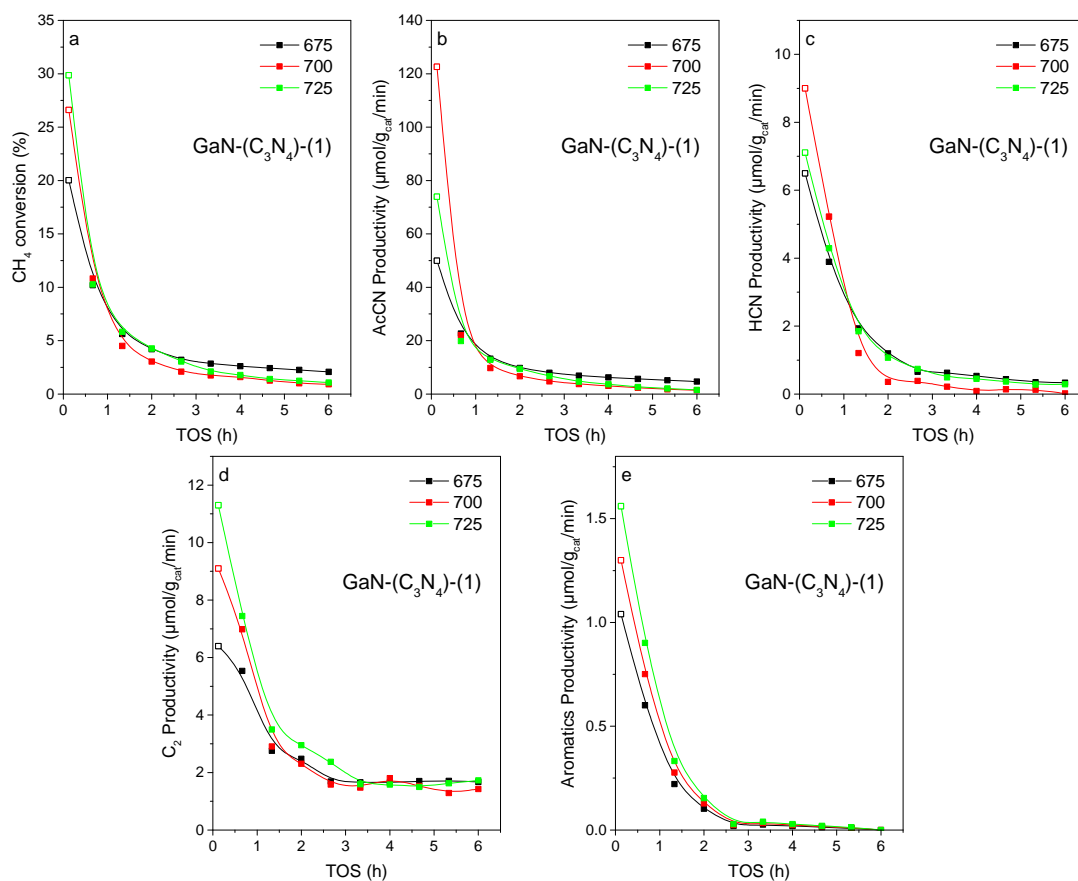

**Figure S3.** The TOS profiles of (a) CH<sub>4</sub> conversion and productivities of (b) AcCN, (c) HCN, (d) C<sub>2</sub>, and (e) aromatics at 675, 700, and 725 °C with GHSV = 3000 mL<sub>CH<sub>4</sub></sub>/g/h by testing GaN-(C<sub>3</sub>N<sub>4</sub>)-(1). The open symbol means the initial activity calculated by using the MS signals; the closed symbol, calculated by the GC responses.

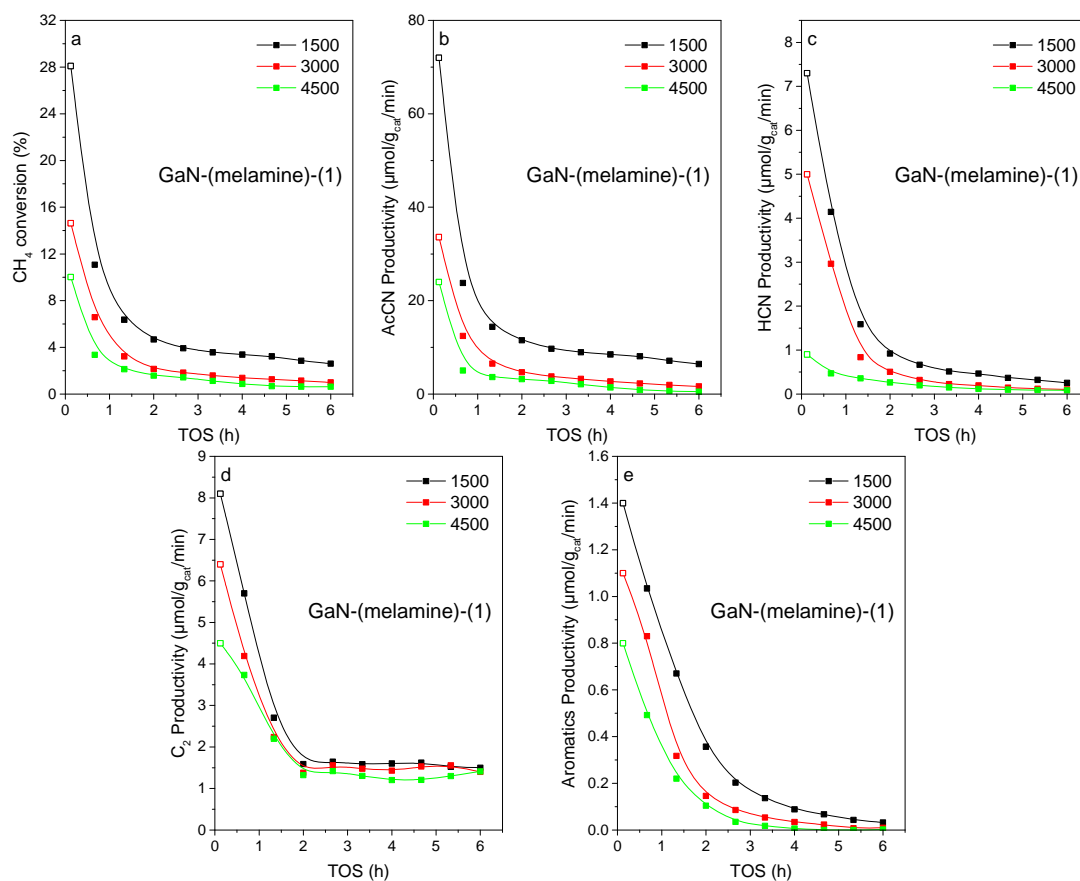

**Figure S4.** The TOS profiles of (a) CH<sub>4</sub> conversion and productivities of (b) AcCN, (c) HCN, (d) C<sub>2</sub>, and (e) aromatics at 700 °C with GHSVs = 1500, 3000, and 4500 mL<sub>CH<sub>4</sub></sub>/g/h by testing GaN-(melamine)-(1). The open symbol means the initial activity calculated by using the MS signals; the closed symbol, calculated by the GC responses.

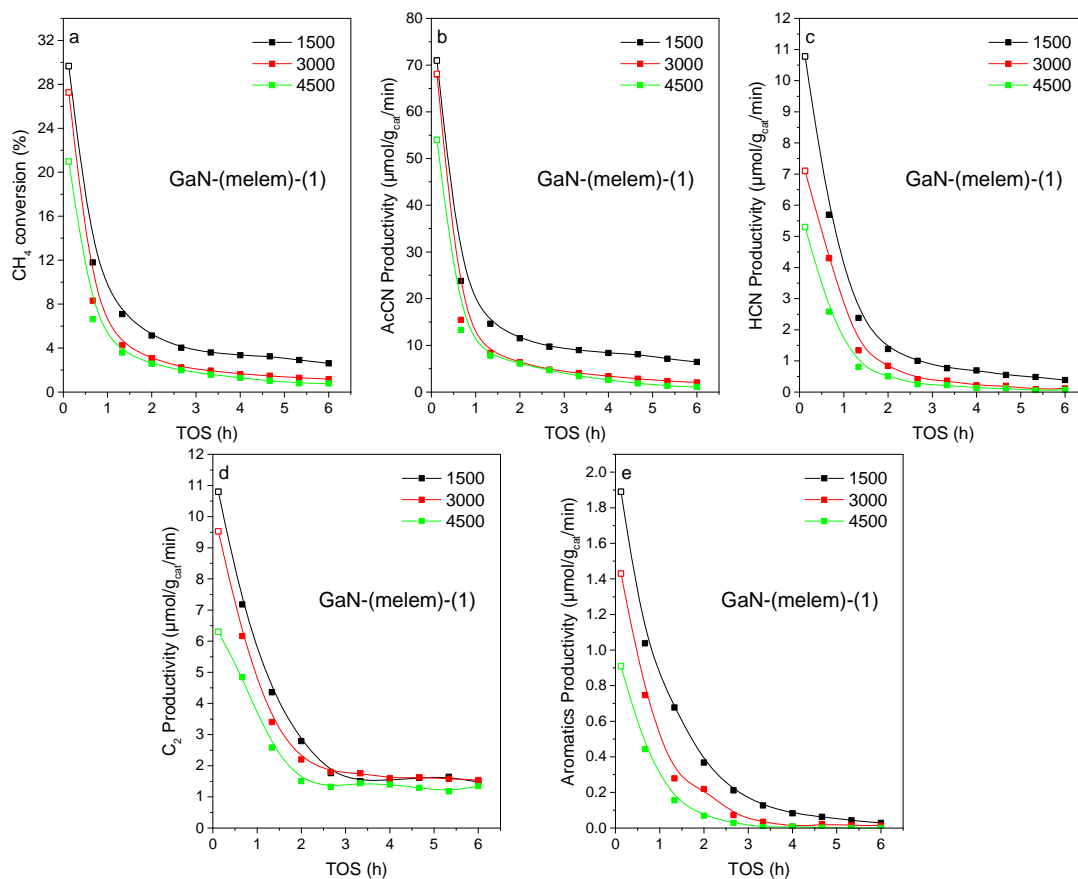

**Figure S5.** The TOS profiles of (a) CH<sub>4</sub> conversion and productivities of (b) AcCN, (c) HCN, (d) C<sub>2</sub>, and (e) aromatics at 700 °C with GHSVs = 1500, 3000, and 4500 mL<sub>CH<sub>4</sub></sub>/g/h by testing GaN-(melem)-(1). The open symbol means the initial activity calculated by using the MS signals; the closed symbol, calculated by the GC responses.

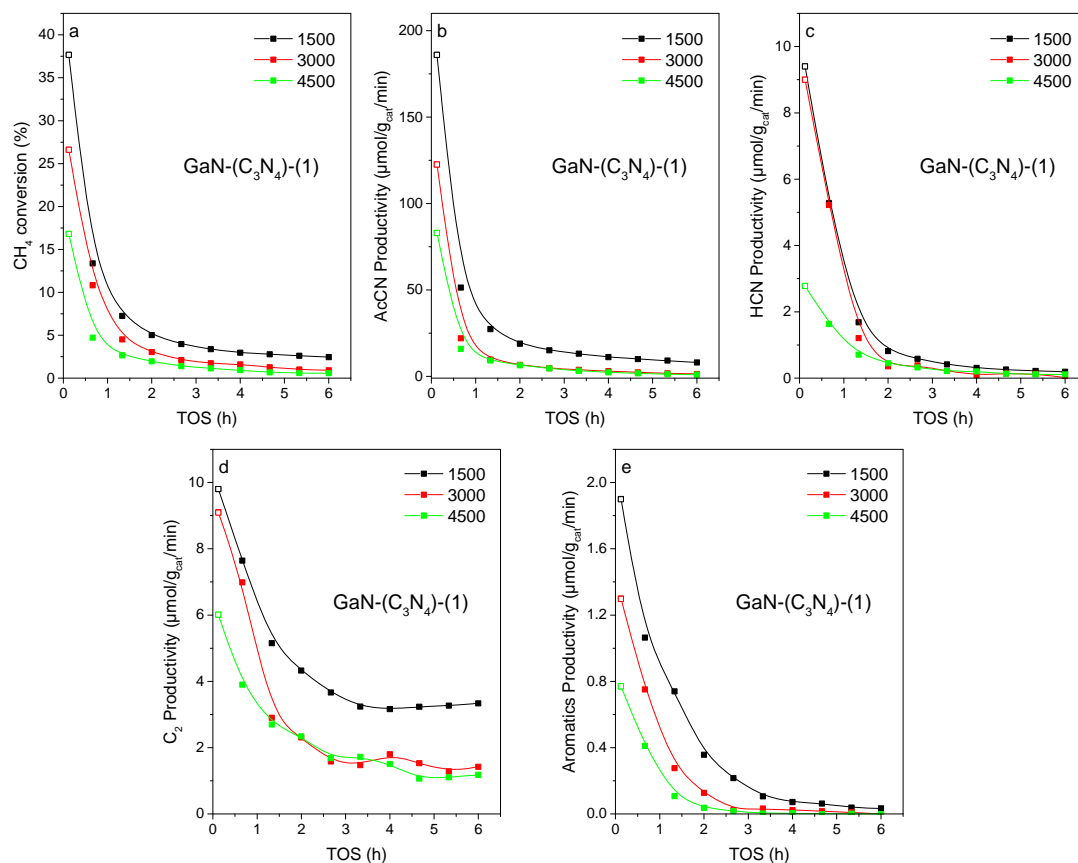

**Figure S6.** The TOS profiles of (a) CH<sub>4</sub> conversion and productivities of (b) AcCN, (c) HCN, (d) C<sub>2</sub>, and (e) aromatics at 700 °C with GHSVs = 1500, 3000, and 4500 mL<sub>CH<sub>4</sub></sub>/g/h by testing GaN-(C<sub>3</sub>N<sub>4</sub>)-(1). The open symbol means the initial activity calculated by using the MS signals; the closed symbol, calculated by the GC responses.



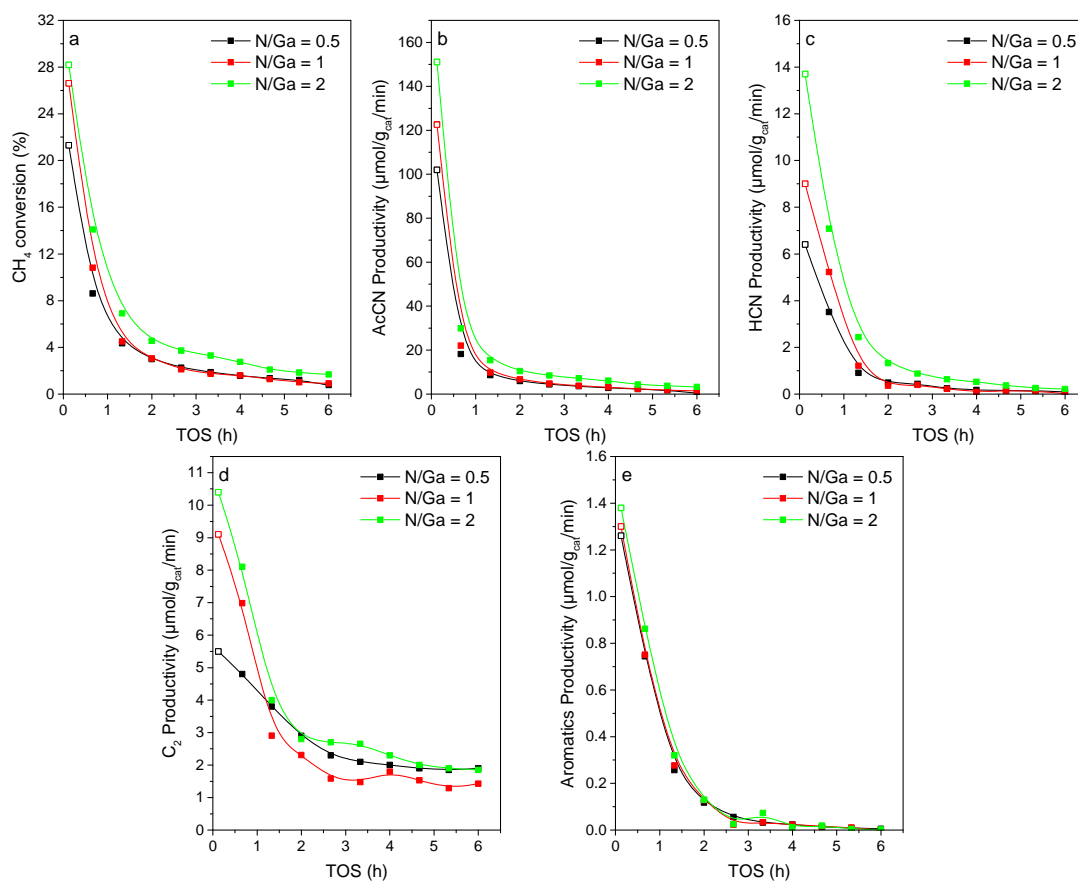

**Figure S7.** The TOS profiles of (a)  $\text{CH}_4$  conversion and productivities of (b) AcCN, (c) HCN, (d)  $\text{C}_2$ , and (e) aromatics at 700 °C with  $\text{GHSV} = 3000 \text{ mL}_{\text{CH}_4}/\text{g}/\text{h}$  by testing GaN-( $\text{C}_3\text{N}_4$ )-(0.5, 1, and 2) catalysts. The open symbol means the initial activity calculated by using the MS signals; the closed symbol, calculated by the GC responses.

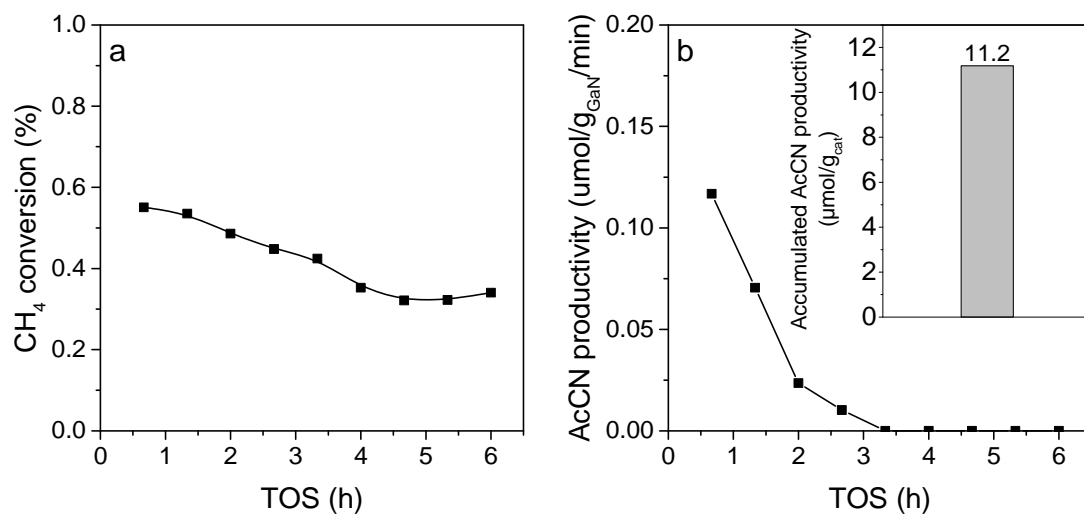

**Figure S8.** (a) The methane conversion and (b) AcCN productivity of c-GaN at 700 °C with GHSV = 3000 mL<sub>CH<sub>4</sub></sub>/g/h.

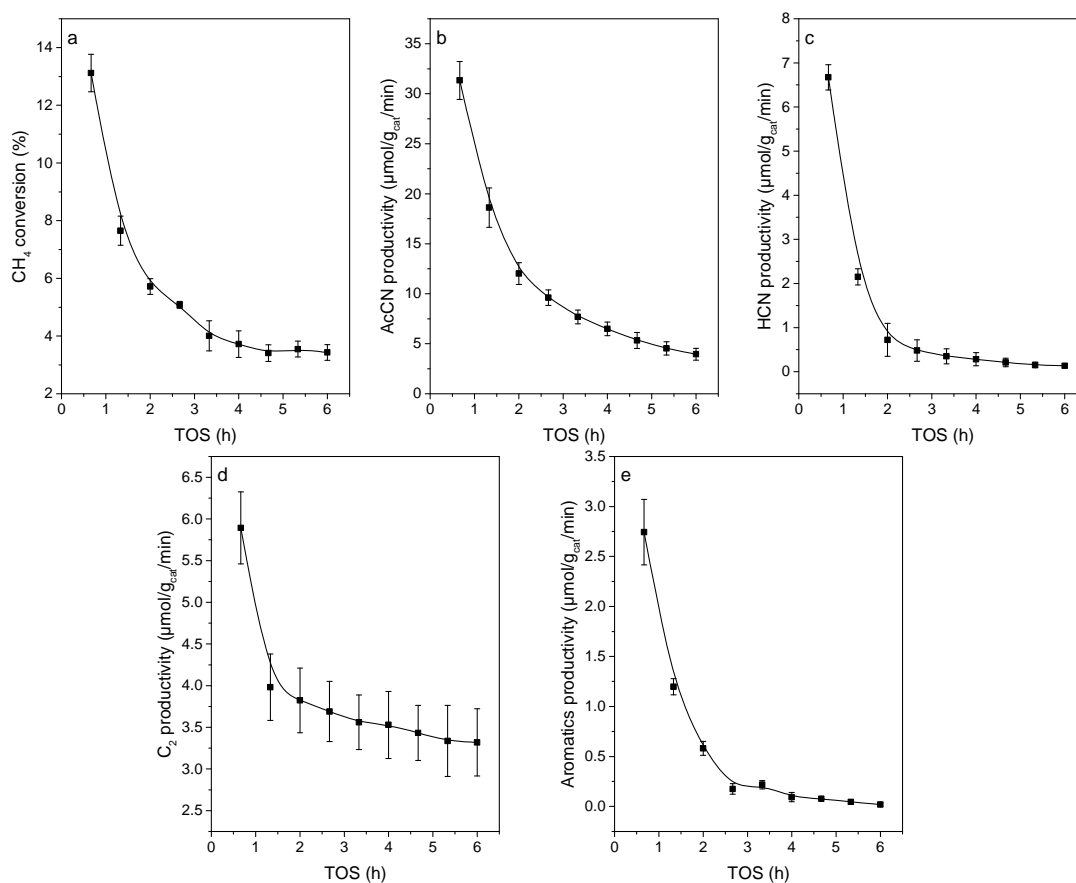

**Figure S9.** The TOS profiles of a reproducibility testing of (a) CH<sub>4</sub> conversion and productivities of (b) AcCN, (c) HCN, (d) C<sub>2</sub>, and (e) aromatics at 700 °C with GHSV = 3000 mL<sub>CH<sub>4</sub></sub>/g/h by testing GaN-(C<sub>3</sub>N<sub>4</sub>)-(2).

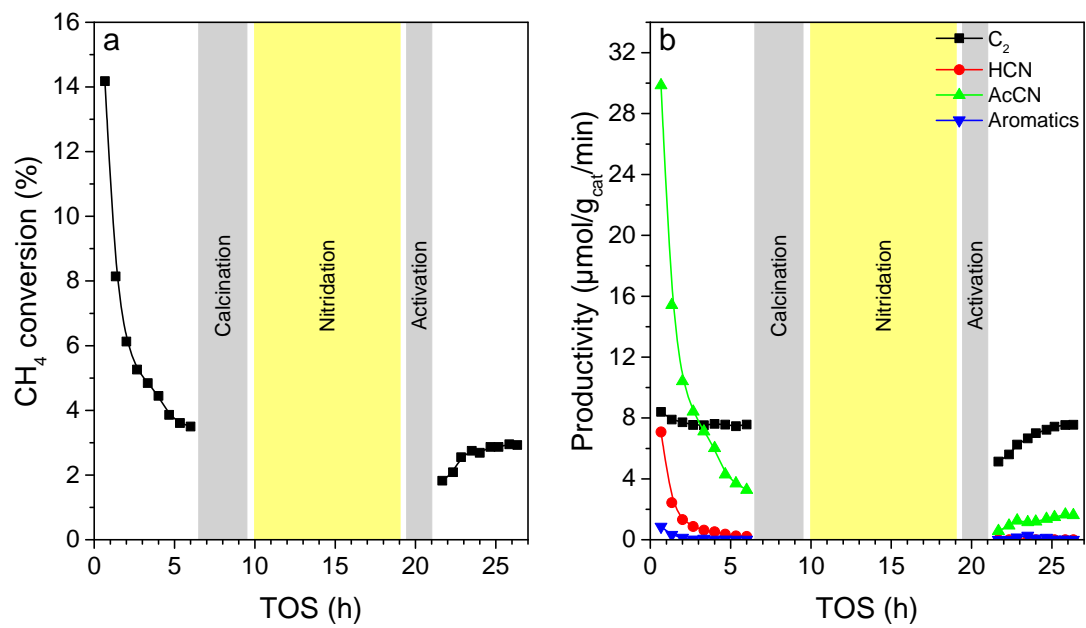

**Figure S10.** (a) Methane conversion and (b) productivities of AcCN, C<sub>2</sub>, HCN, and aromatics of the regeneration test of GaN-(C<sub>3</sub>N<sub>4</sub>)-(2) using the calcination-nitridation method.

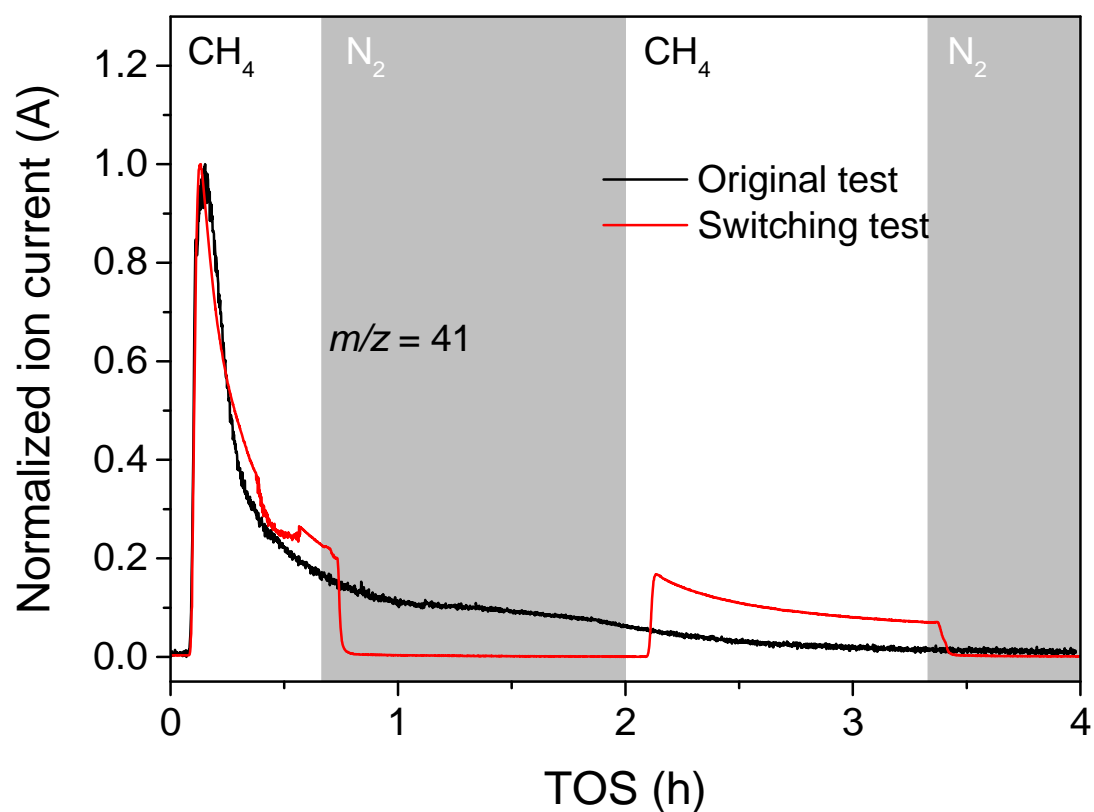

**Figure S11.** The AcCN MS signal ( $m/z = 41$ ) of the alternating feeding test of  $\text{CH}_4\text{-N}_2\text{-CH}_4$  using  $\text{GaN-(C}_3\text{N}_4\text{)-(2)}$  as the catalyst at  $700\text{ }^\circ\text{C}$  with a GHSV of  $3000\text{ mL}_{\text{CH}_4}/\text{g}_{\text{cat}}/\text{h}$ . Reaction conditions:  $g_{\text{cat}} = 0.2\text{ g}$  and methane flow rate =  $10\text{ mL}/\text{min}$ . After collecting the data for 40 min, the flow was switched to a  $\text{N}_2$  flow ( $10\text{ mL}/\text{min}$ ). The  $\text{N}_2$  flow was maintained for 80 min, and was then switched back to methane.

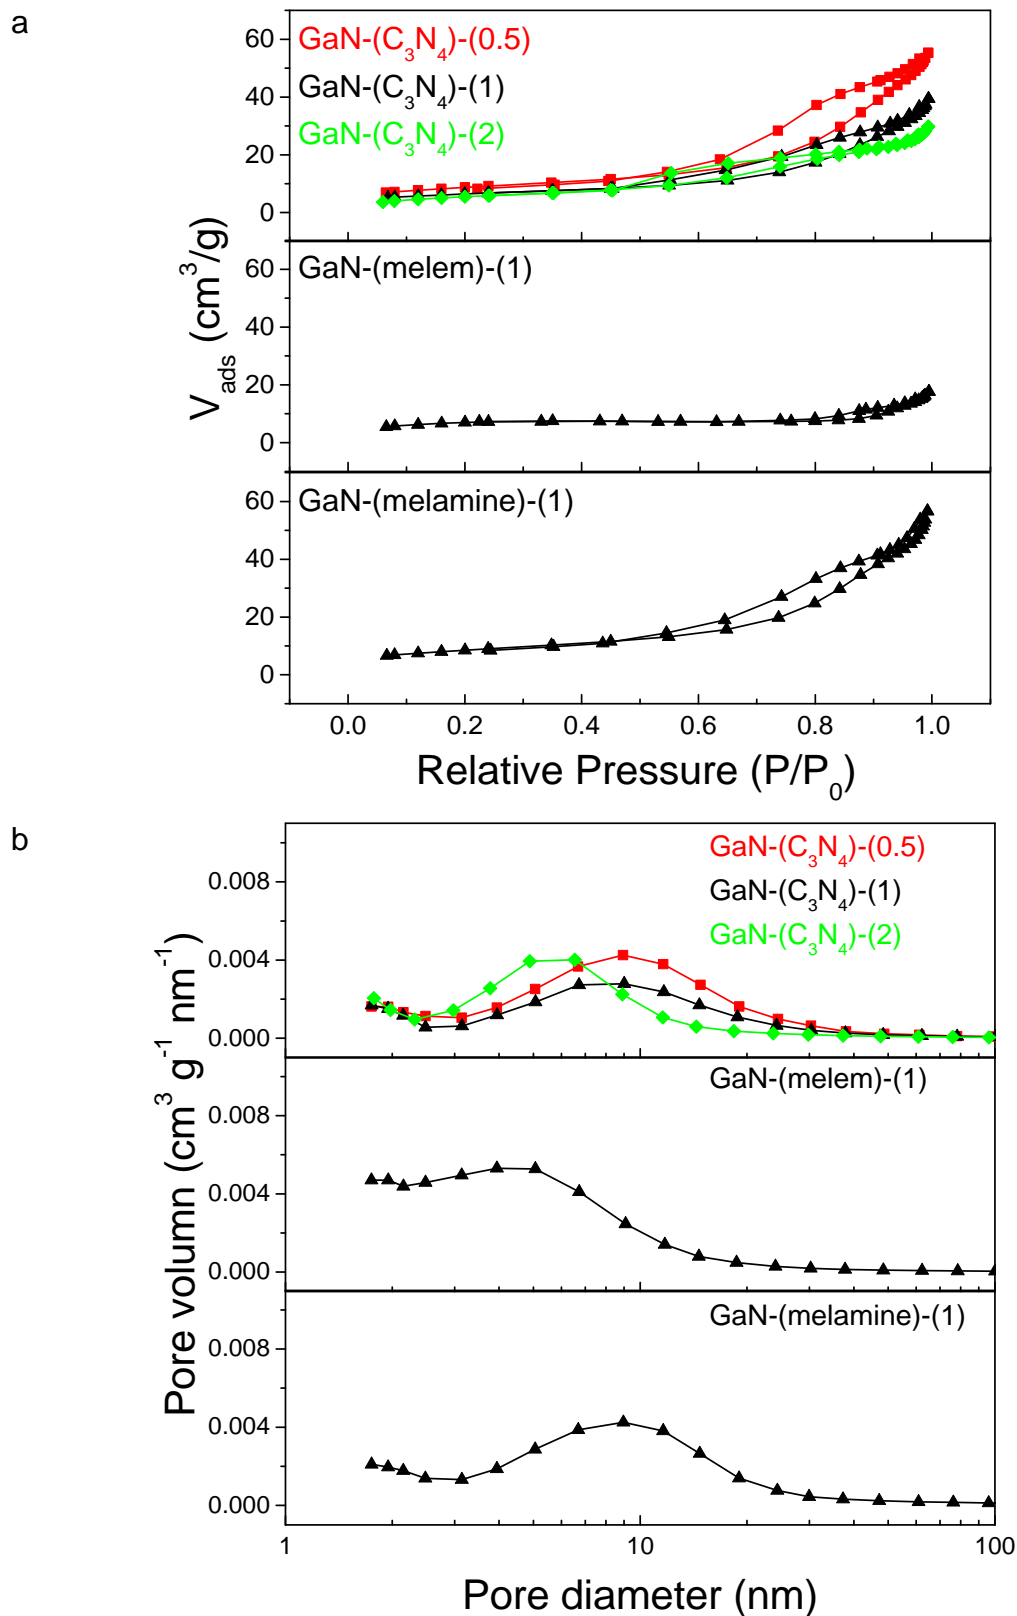

**Figure S12.** (a) The adsorption-desorption isotherms and (b) pore size distributions of tested catalysts.

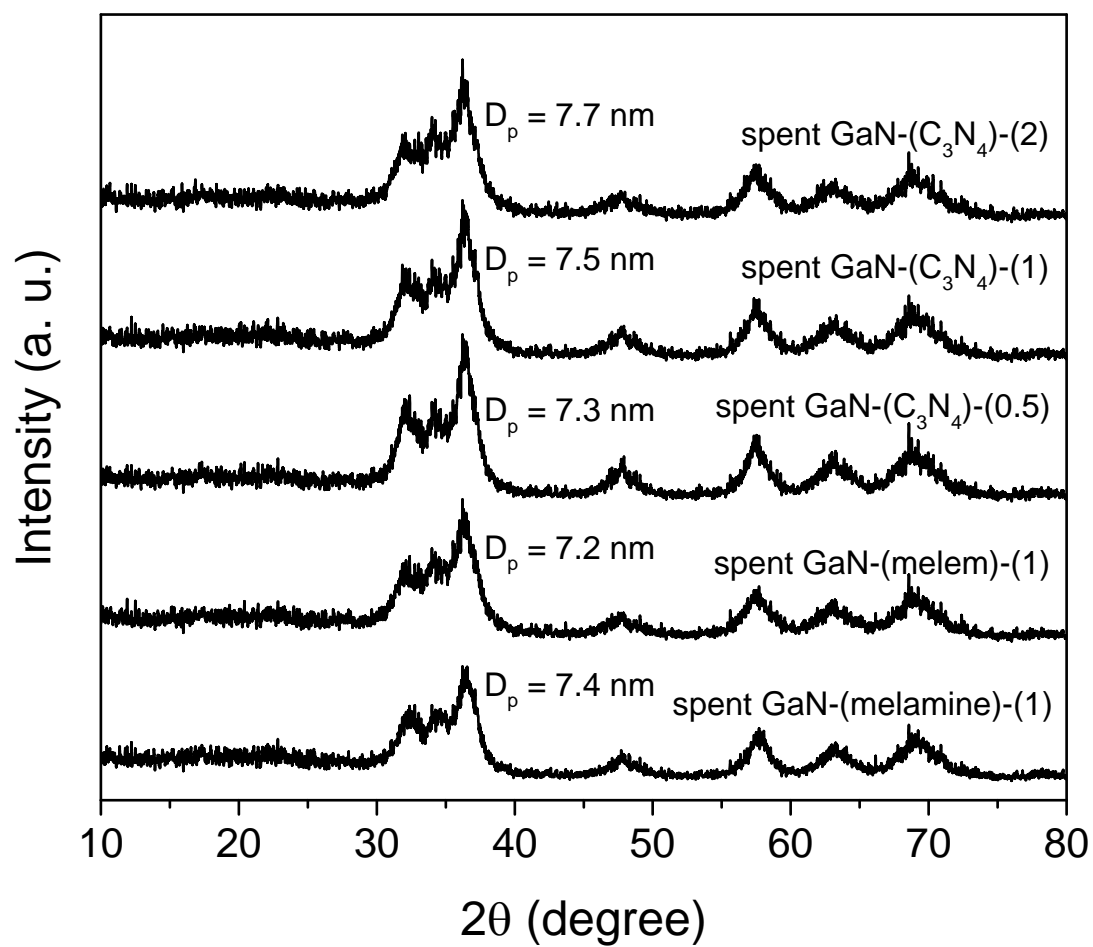

**Figure S13.** The XRD patterns of the post-reaction GaN catalysts.

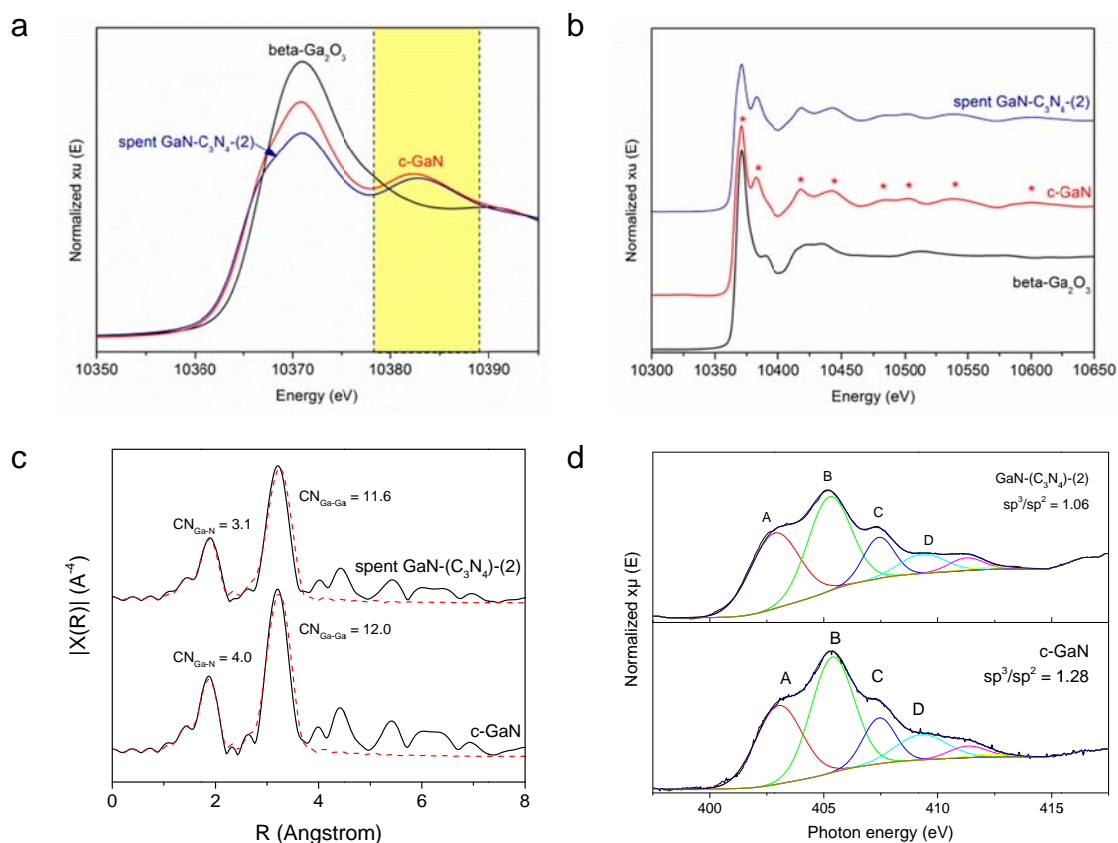

**Figure S14.** (a) Ga  $K$ -edge XANES and (b) the eight oscillation peaks (marked with asterisks) in the first 300 eV above the edge of spent GaN-(C<sub>3</sub>N<sub>4</sub>)-(2) and c-GaN. (c) Ga-N phase corrected RDFs of Ga  $K$ -edge for spent GaN-(C<sub>3</sub>N<sub>4</sub>)-(2) and c-GaN. The solid line represents the experimental data, and the dashed line represents the computer fit. (d) N  $K$ -edge XANES of spent GaN-(C<sub>3</sub>N<sub>4</sub>)-(2) and c-GaN. The fitted peaks of G<sub>1</sub> (red), G<sub>2</sub> (green), G<sub>3</sub> (blue), G<sub>4</sub> (cyan), G<sub>5</sub> (magenta), and G<sub>6</sub> (yellow) were included.



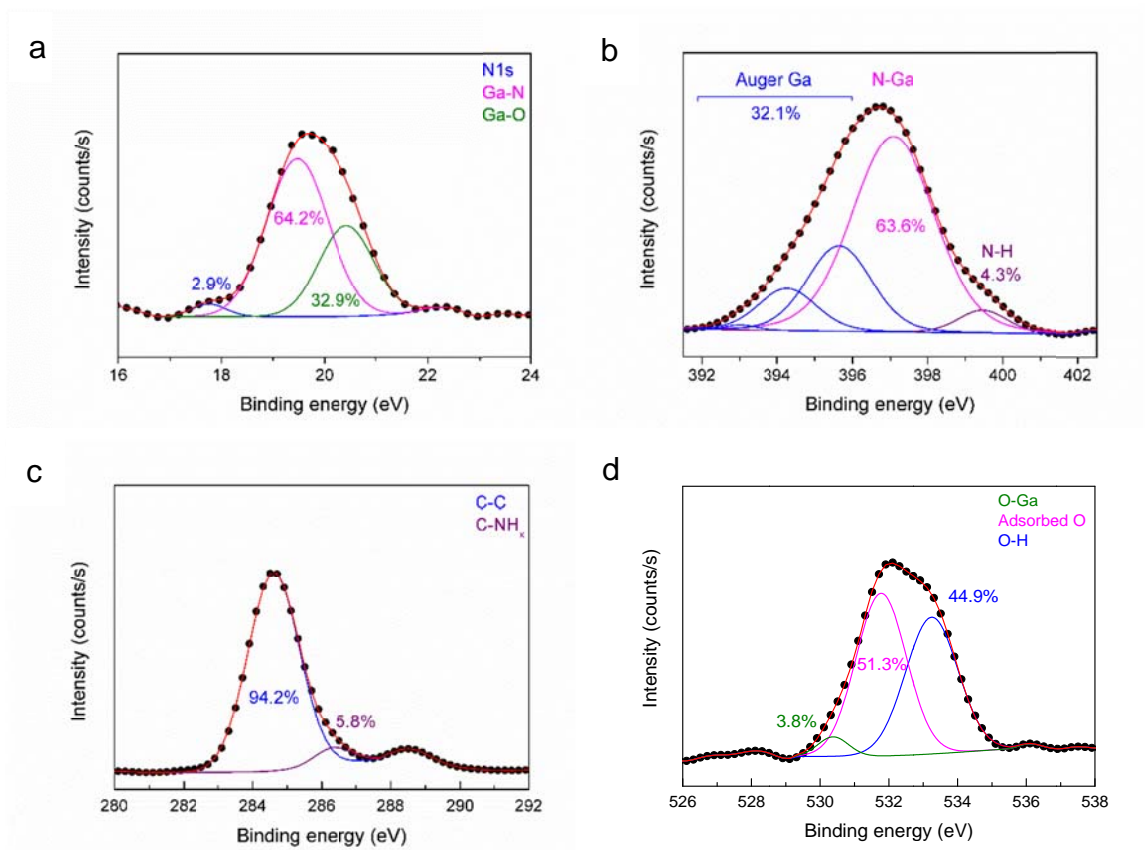

**Figure S15.** XPS spectra of (a) Ga 3d, (b) N 1s, (c) C 1s, and (d) O 1s photolines of c-GaN.

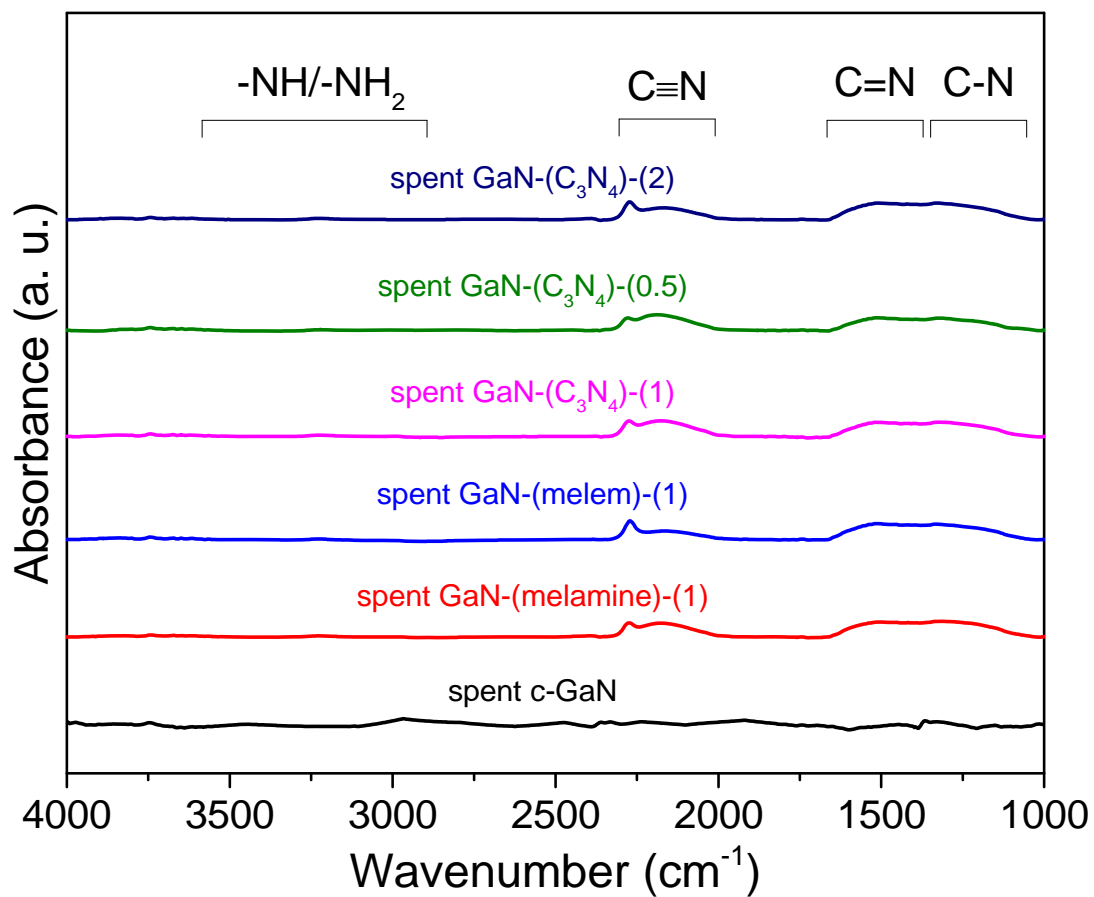

**Figure S16.** FTIR spectra of the post-reaction GaN catalysts.

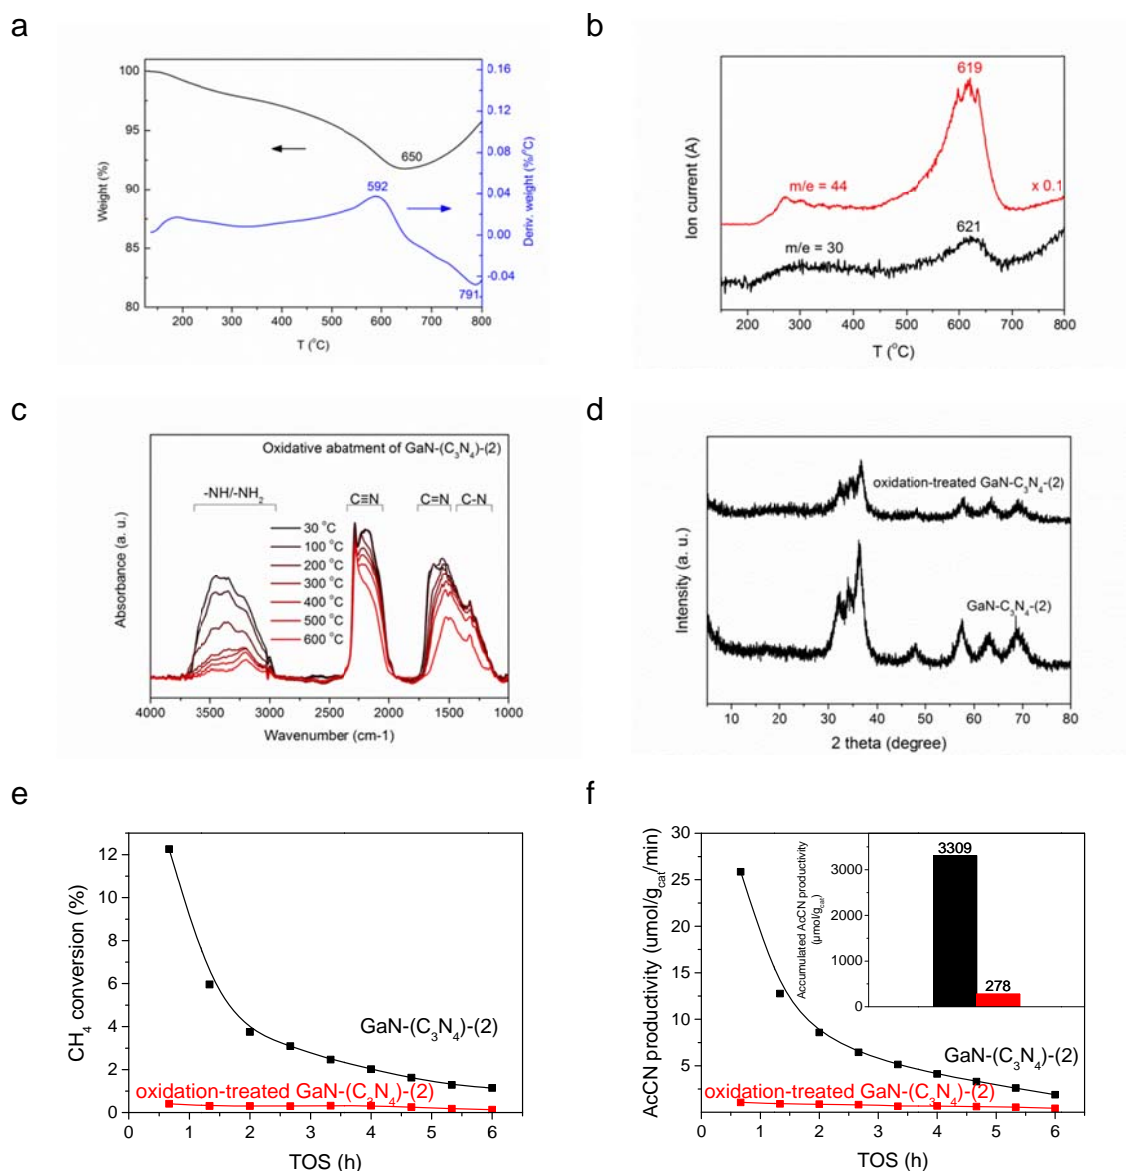

**Figure S17.** (a) TGA/DTA profiles, (b) the MS fragments ( $m/e = 30$  and  $44$ ) of  $\text{GaN}-(\text{C}_3\text{N}_4)-(2)$  in an air stream ( $100 \text{ mL/min}$ ). (c) The temperature-resolved in-situ IR spectra of  $\text{GaN}-(\text{C}_3\text{N}_4)-(2)$  from  $30$  to  $600 \text{ }^\circ\text{C}$  in a  $10\% \text{ O}_2/\text{N}_2$  stream ( $20 \text{ mL/min}$ ). (d) The XRD patterns of  $\text{GaN}-(\text{C}_3\text{N}_4)-(2)$  after subjecting to the oxidative abatement and its fresh counterpart. (e) Methane conversion and (f) AcCN productivity of  $\text{GaN}-(\text{C}_3\text{N}_4)-(2)$  after subjecting to the oxidative abatement at  $700 \text{ }^\circ\text{C}$ .

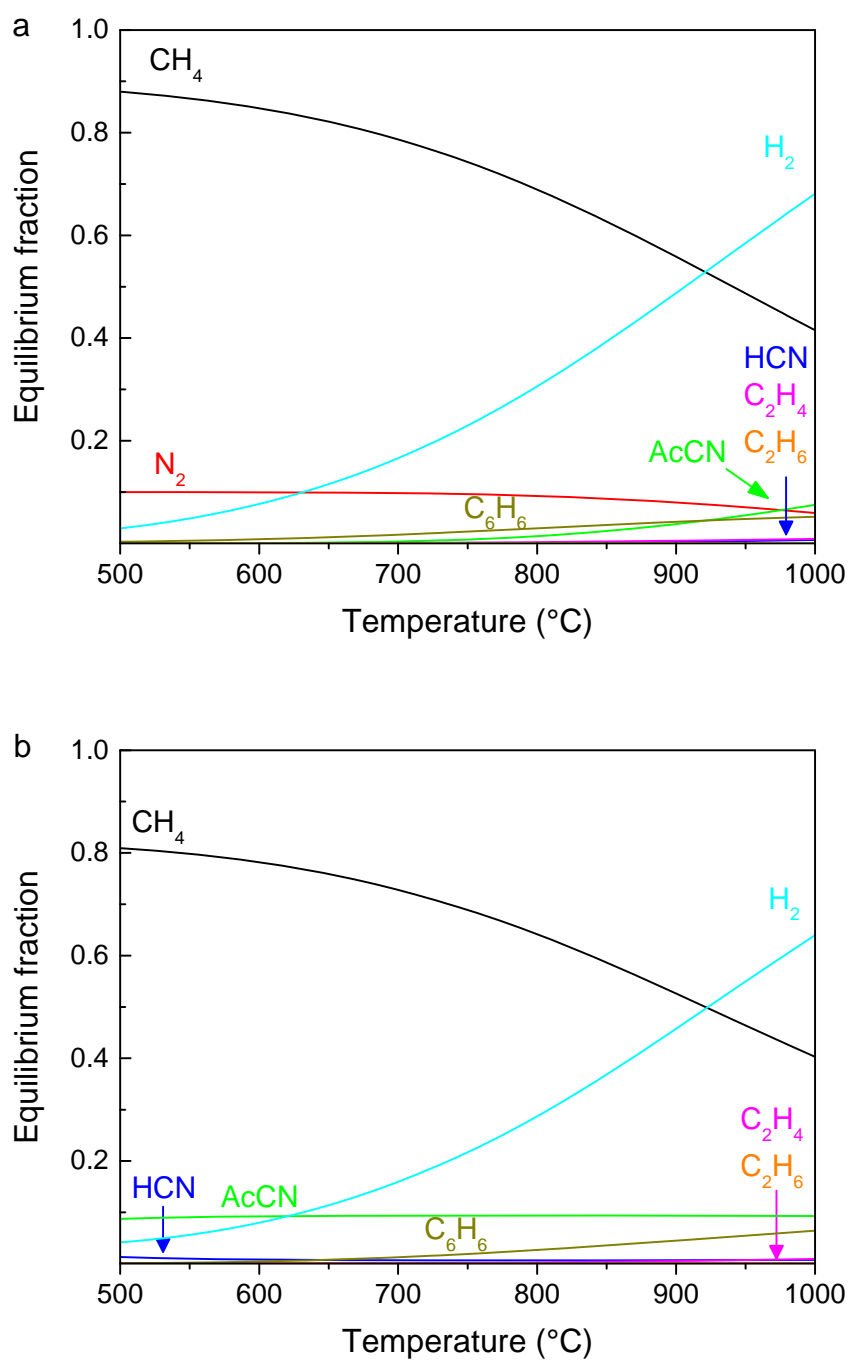

**Figure S18.** Calculated equilibrium compositions of AcCN, HCN,  $\text{H}_2$ ,  $\text{C}_2\text{H}_4$ ,  $\text{C}_2\text{H}_6$ , and  $\text{C}_6\text{H}_6$  using (a)  $\text{CH}_4$  and  $\text{N}_2$  and (b)  $\text{CH}_4$  and  $\text{CN}$  as the feeds ( $\text{CH}_4/\text{N}_2$  or  $\text{CH}_4/\text{CN} = 9/1$ ) in 500 to 1000 °C under ambient pressure.

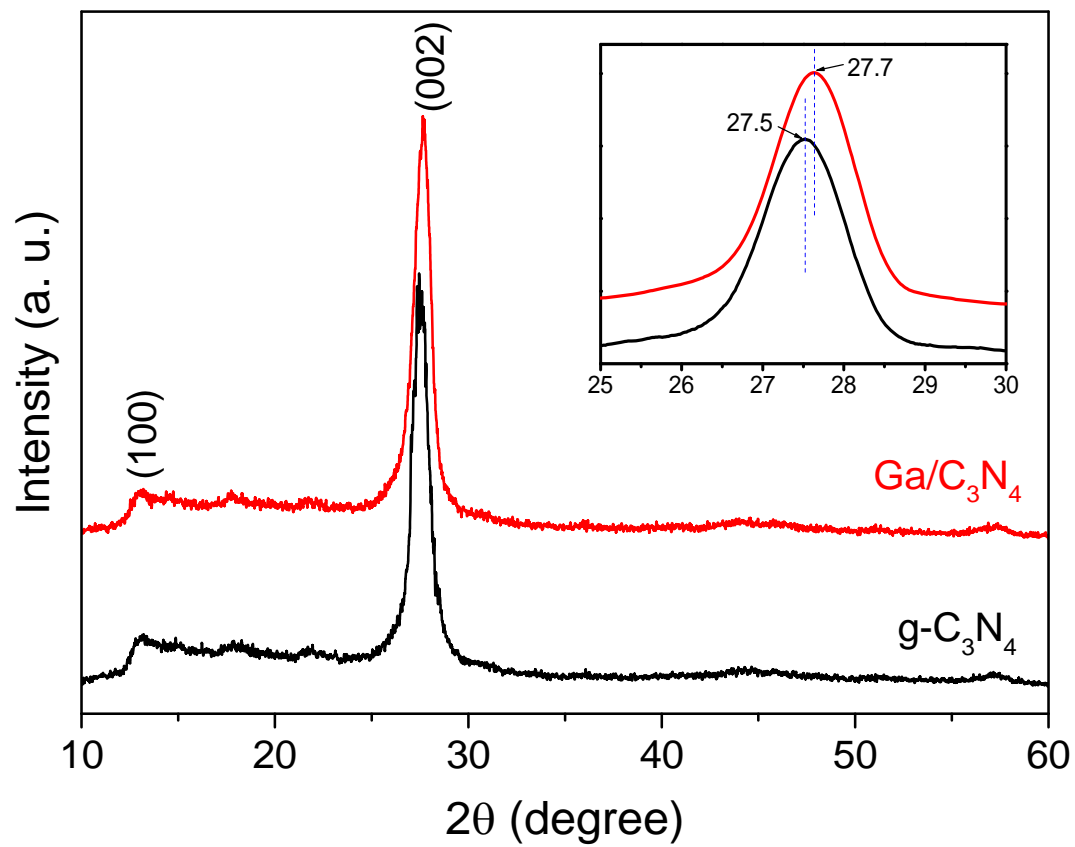

**Figure S19.** XRD patterns of  $\text{g-C}_3\text{N}_4$  and  $550^\circ\text{C}$  pyrolyzed precursor ( $\text{Ga/C}_3\text{N}_4$ ).

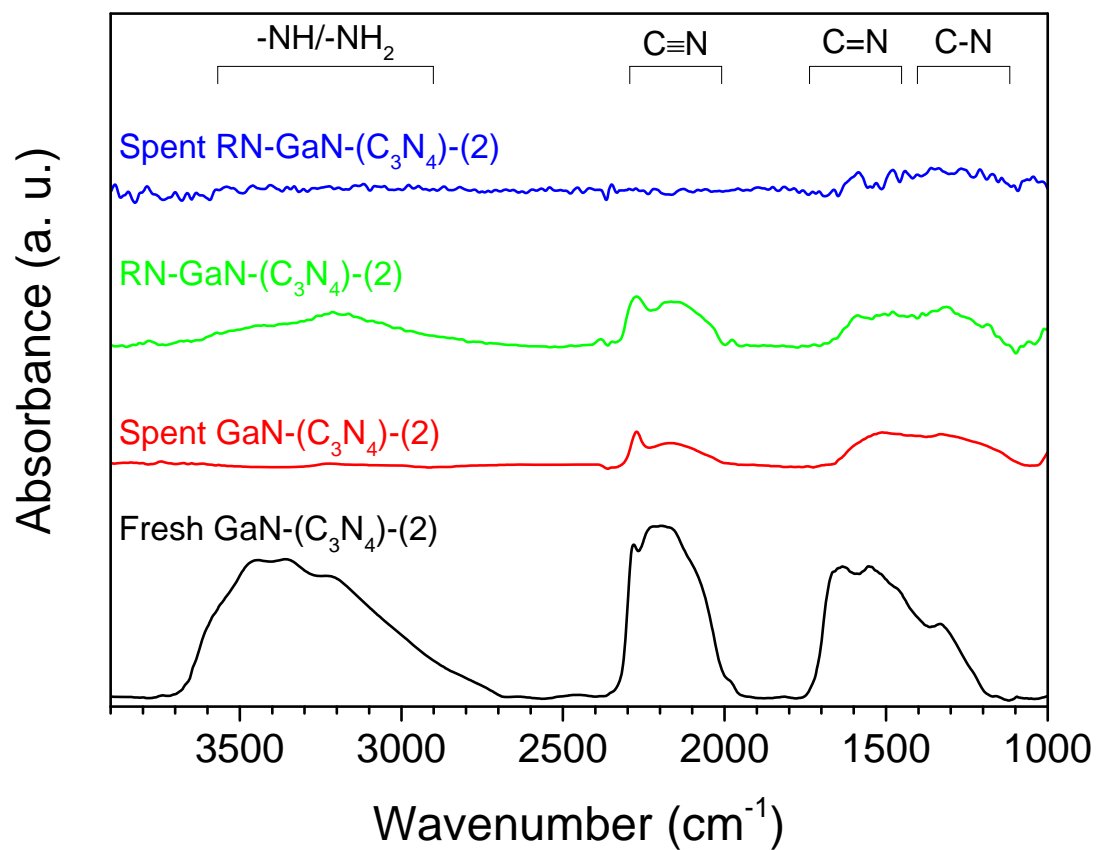

**Figure S20.** FTIR spectra of fresh GaN-(C<sub>3</sub>N<sub>4</sub>)-(2) (black), spent GaN-(C<sub>3</sub>N<sub>4</sub>)-(2) (red), regenerated GaN-(C<sub>3</sub>N<sub>4</sub>)-(2) (RN-GaN-(C<sub>3</sub>N<sub>4</sub>)-(2), before the 2<sup>nd</sup> on-stream test, green), and spent RN-GaN-(C<sub>3</sub>N<sub>4</sub>)-(2) (after the 2<sup>nd</sup> on-stream test, blue).

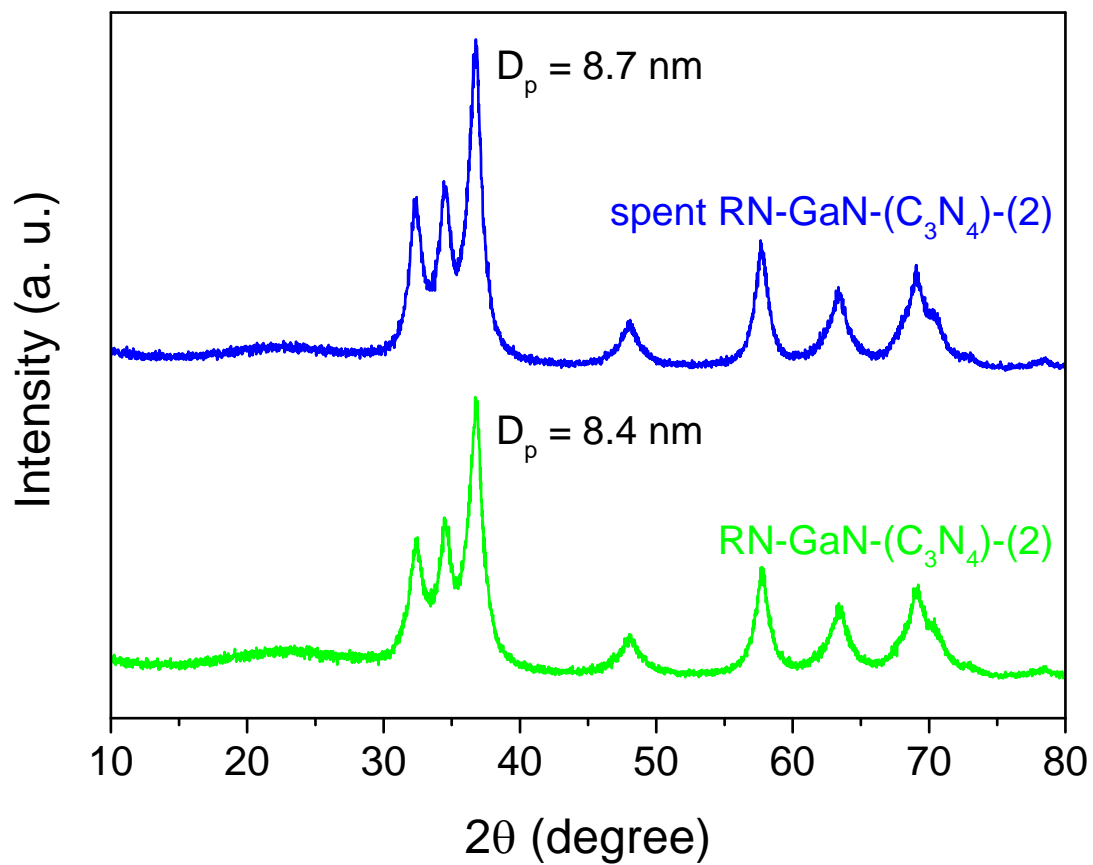

**Figure S21.** The XRD patterns of regenerated GaN-(C<sub>3</sub>N<sub>4</sub>)-(2) (RN-GaN-(C<sub>3</sub>N<sub>4</sub>)-(2), before the 2<sup>nd</sup> on-stream test, green) and spent RN-GaN-(C<sub>3</sub>N<sub>4</sub>)-(2) (after the 2<sup>nd</sup> on-stream test, blue).
